# Supplementary material for: Auranofin Releasing Antibacterial and Antibiofilm Polyurethane Intravascular Catheter Coatings
Source: PubMed Central journal article supplement (PMC6403144; doi:10.3389/fcimb.2019.00037), 2019-02-28
Supplement: Data_Sheet_1.pdf [file Data_Sheet_1.pdf]

## Supplementary Material

### Auranofin Releasing Antibacterial and Antibiofilm Polyurethane Intravascular Catheter Coatings

Hanyang Liu,<sup>1†</sup> Shashank Shukla,<sup>1†</sup> Noel Vera-González,<sup>1†</sup> Nagendran Tharmalingam,<sup>2</sup> Eleftherios Mylonakis,<sup>2</sup> Beth Burgwyn Fuchs,<sup>2</sup> and Anita Shukla<sup>1\*</sup>

<sup>1</sup>School of Engineering, Center for Biomedical Engineering, Institute for Molecular and Nanoscale Innovation, Brown University, 182 Hope Street Box D, Providence, RI, USA

<sup>2</sup>Division of Infectious Diseases, Rhode Island Hospital, Alpert Medical School and Brown University, 593 Eddy Street, Providence, RI, USA

<sup>†</sup>These authors have contributed equally to this work and are co-first authors.

#### \* Correspondence:

Dr. Anita Shukla  
anita\_shukla@brown.edu

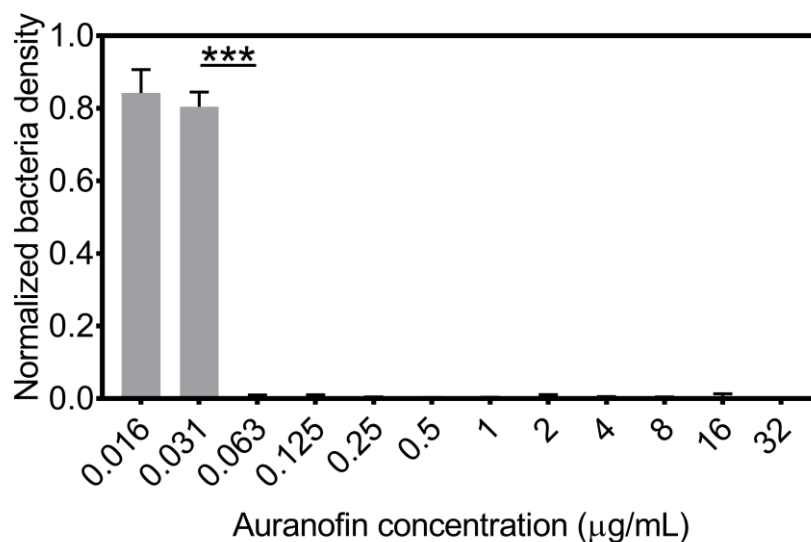

**Figure S1: MIC of auranofin against MRSA USA 300.** Data are shown as mean  $\pm$  standard deviation where \*\*\*  $p < 0.001$  between auranofin concentrations evaluated using one-way ANOVA ( $n = 3$ ).

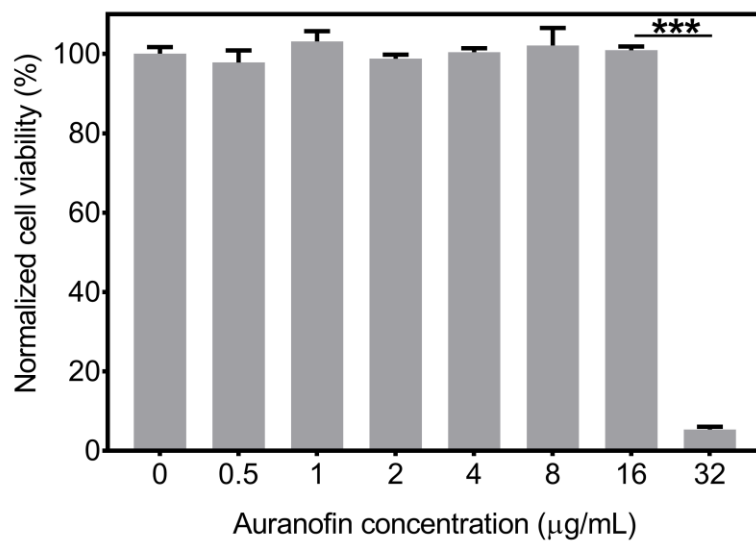

**Figure S2: Auranofin toxicity to liver hepatocellular carcinoma (HepG2) cells.** Data are shown as mean  $\pm$  standard deviation where \*\*\*  $p < 0.001$  between auranofin concentrations evaluated using one-way ANOVA ( $n = 3$ ).
